# Supplementary material for: Polyisoprene-based block copolymers as supports for metallocene and post-metallocene catalytic systems toward ethylene polymerization
Source: Royal Society of Chemistry journal article supplement (doi:10.1039/c1nj20309f), 2011-01-01
Supplement: c1nj20309f.pdf [file c1nj20309f.pdf]

# Polyisoprene block copolymers as support for metallocene and post-metallocene catalytic systems toward ethylene polymerization

Bertrand Heurtefeu,<sup>†,‡</sup> Jules Oriou,<sup>†,‡</sup> Emmanuel Ibarboure,<sup>†,‡</sup> Éric Cloutet,<sup>†,‡</sup> and Henri Cramail<sup>†,‡,\*</sup>

<sup>†</sup> Université de Bordeaux, Laboratoire de Chimie des Polymères Organiques, IPB-ENSCBP, 16, Avenue Pey Berland, Pessac Cedex, F-33607, France

<sup>‡</sup> CNRS, Laboratoire de Chimie des Polymères Organiques, Pessac Cedex, F-33607 France

\* [cramail@enscbp.fr](mailto:cramail@enscbp.fr)

## Supporting Information

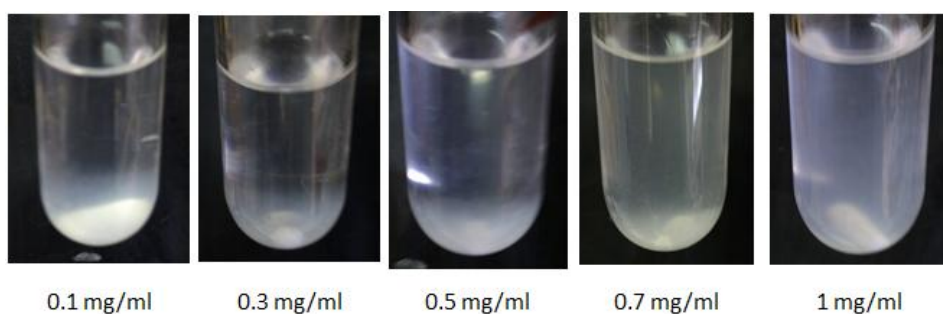

**Fig. 1** Photography of PI<sub>270</sub>-*b*-PMMA<sub>54</sub> dispersions with MAO. At 1 mg/ml, no more sedimentation is observed.

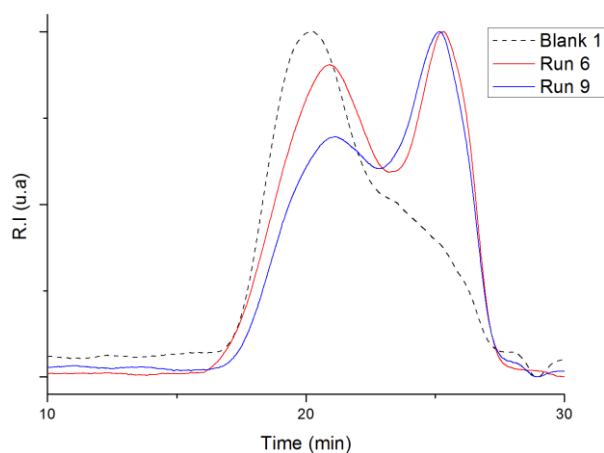

**Fig. 2** SEC traces of polyethylenes produced with PI<sub>71</sub>-*b*-PMMA<sub>10</sub> as a support and MeDIP(2,6*i*PrPh)<sub>2</sub>FeCl<sub>2</sub> as a catalyst (detector: refractometer)

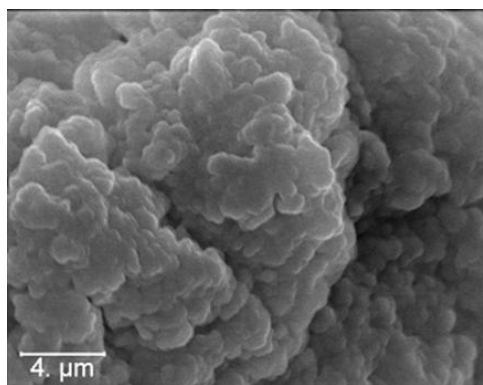

**Fig. 3** SEM picture of PE prepared MeDIP(2,6iPrPh)<sub>2</sub>FeCl<sub>2</sub> in the presence of PI<sub>71</sub>-*b*-PMMA<sub>10</sub> (run 7)

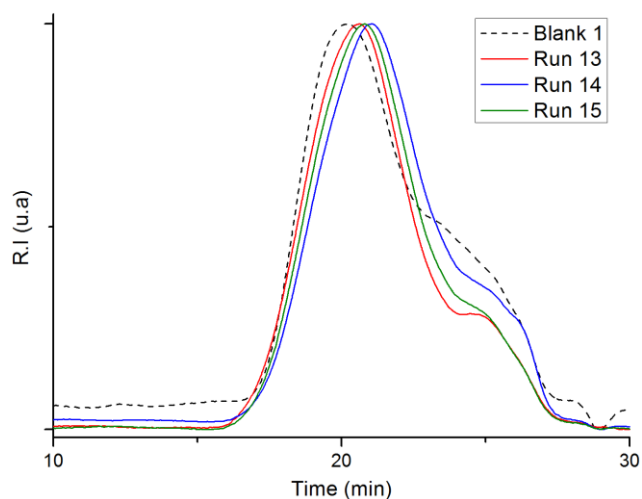

**Fig. 4** SEC traces of polyethylenes produced with PI<sub>71</sub>-*b*-PMMA<sub>10</sub> as a support and MeDIP(2,6iPrPh)<sub>2</sub>FeCl<sub>2</sub> as a catalyst (detector: refractometer)

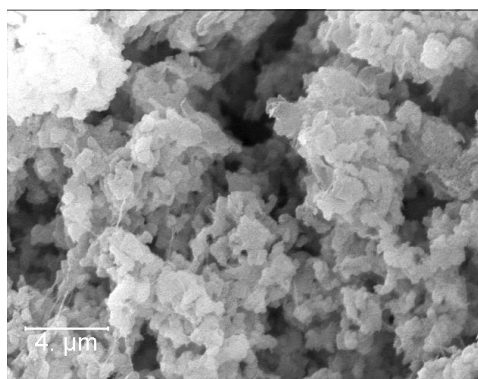

**Fig. 5** SEM picture of PE prepared MeDIP(2,6iPrPh)<sub>2</sub>FeCl<sub>2</sub> in the presence of PI<sub>16</sub>-*b*-PMMA<sub>4</sub> (run 15)

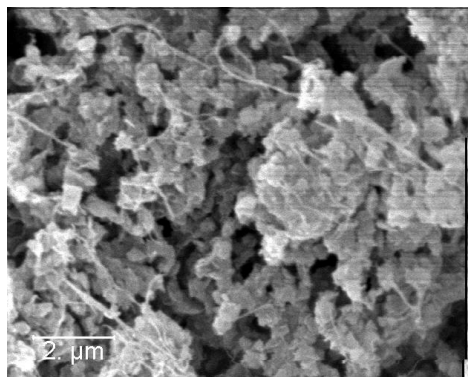

**Fig. 6** SEM picture of PE prepared MeDIP(2,6iPrPh)<sub>2</sub>FeCl<sub>2</sub> in the presence of PI<sub>27</sub>-*b*-PEO<sub>4</sub> (run 10)

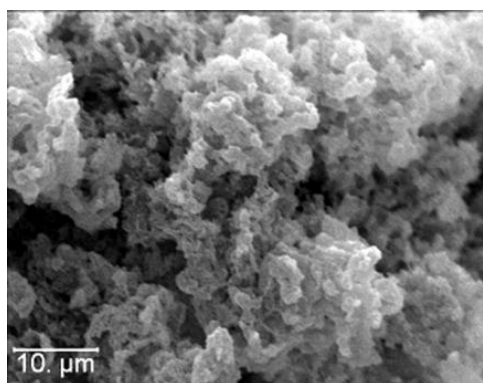

**Fig. 7** SEM picture of PE prepared Ind<sub>2</sub>ZrCl<sub>2</sub> in the presence of PI<sub>270</sub>-*b*-PMMA<sub>54</sub> (run 5)

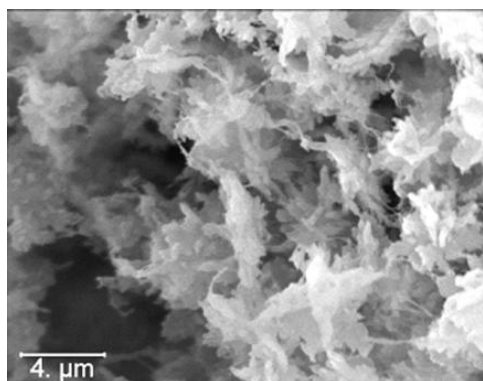

**Fig. 8** SEM picture of PE prepared with Ind<sub>2</sub>ZrCl<sub>2</sub> in the presence of PI<sub>71</sub>-*b*-PMMA<sub>10</sub> (run 8)

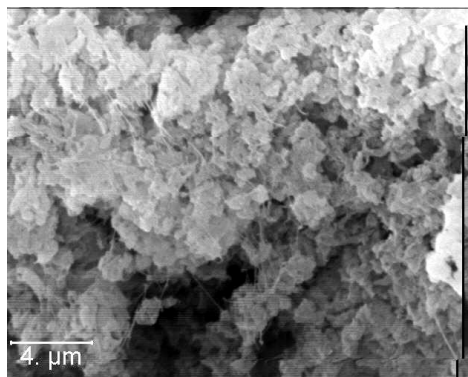

**Fig. 9** SEM picture of PE prepared  $\text{Ind}_2\text{ZrCl}_2$  in the presence of  $\text{PI}_{27}\text{-}b\text{-PEO}_{50}$  (run 3)
